# Supplementary material
Source: PubMed Central journal article supplement (PMC8372401)
Supplement: neurintsurg-2020-016427supp001.pdf [file neurintsurg-2020-016427supp001.pdf]

## Supplementary Material

**Supplemental Table 1.** Imaging core laboratory adjudicated reperfusion rates for M1 (N=126) and M2 (N=57) middle cerebral artery (MCA) occlusions.

|                                   | <b>MCA M1<br/>(N=126)</b> | <b>MCA M2<br/>(N=57)</b> | <b>p value*</b> |
|-----------------------------------|---------------------------|--------------------------|-----------------|
| First Pass mTICI ≥ 2b             | 65 (51.6%)                | 28 (49.1%)               | 0.7575          |
| First Pass mTICI ≥ 2c             | 48 (38.1%)                | 22 (38.6%)               | 0.9485          |
| First Pass mTICI 3                | 33 (26.2%)                | 18 (31.6%)               | 0.4515          |
| Last of up to 3 Passes mTICI ≥ 2b | 100 (79.4%)               | 45 (78.9%)               | 0.9486          |
| Last of up to 3 Passes mTICI ≥ 2c | 78 (61.9%)                | 37 (64.9%)               | 0.6966          |
| Last of up to 3 Passes mTICI 3    | 49 (38.9%)                | 29 (50.9%)               | 0.1288          |
| Final Pass mTICI ≥ 2b             | 116 (92.1%)               | 52 (91.2%)               | 1.0000          |
| Final Pass mTICI ≥ 2c             | 94 (74.6%)                | 42 (73.7%)               | 0.8952          |
| Final Pass mTICI 3                | 59 (46.8%)                | 32 (56.1%)               | 0.2432          |

\*For categorical variables, p-values are generated using a  $\chi^2$  test or a Fisher's exact test (due to expected cell sizes < 5) as appropriate.

**Supplemental Table 2.** Adverse events in the entire cohort, and subgroups of M1 and M2 occlusions.

| Event Term                     | All Patients<br>(N=183) |             | MCA M1<br>(N=126) |             | MCA M2<br>(N=57) |             |
|--------------------------------|-------------------------|-------------|-------------------|-------------|------------------|-------------|
|                                | Related                 | Not Related | Related           | Not Related | Related          | Not Related |
| HBC-HI-1*                      | 3 (1.6%)                | 16 (8.7%)   | 2 (1.6%)          | 14 (11.1%)  | 1 (1.8%)         | 2 (3.5%)    |
| HBC-HI-2                       | 2 (1.1%)                | 23 (12.6%)  | 2 (1.6%)          | 14 (11.1%)  | 0 (0%)           | 9 (15.8%)   |
| HBC-PH-1                       | 1 (0.5%)                | 3 (1.6%)    | 0 (0%)            | 3 (2.4%)    | 1 (1.8%)         | 0 (0%)      |
| HBC-PH-2                       | 0 (0%)                  | 4 (2.2%)    | 0 (0%)            | 3 (2.4%)    | 0 (0%)           | 1 (1.8%)    |
| Ischemic stroke                | 1 (0.5%)                | 10 (5.5%)   | 1 (0.8%)          | 4 (3.2%)    | 0 (0%)           | 6 (10.5%)   |
| Brain edema                    | 0 (0%)                  | 6 (3.3%)    | 0 (0%)            | 6 (4.8%)    | 0 (0%)           | 0 (0%)      |
| Neurological decompensation    | 1 (0.5%)                | 4 (2.2%)    | 0 (0%)            | 4 (3.2%)    | 1 (1.8%)         | 0 (0%)      |
| Intracranial artery dissection | 4 (2.2%)                | 0 (0%)      | 3 (2.4%)          | 0 (0%)      | 1 (1.8%)         | 0 (0%)      |
| Vessel perforation             | 4 (2.2%)                | 0 (0%)      | 3 (2.4%)          | 0 (0%)      | 1 (1.8%)         | 0 (0%)      |
| Carotid artery dissection      | 3 (1.6%)                | 0 (0%)      | 0 (0%)            | 0 (0%)      | 3 (5.3%)         | 0 (0%)      |
| Cerebral vasoconstriction      | 3 (1.6%)                | 0 (0%)      | 2 (1.6%)          | 0 (0%)      | 1 (1.8%)         | 0 (0%)      |
| Cerebral artery embolism       | 2 (1.1%)                | 0 (0%)      | 2 (1.6%)          | 0 (0%)      | 0 (0%)           | 0 (0%)      |
| Vessel puncture site hematoma  | 2 (1.1%)                | 0 (0%)      | 1 (0.8%)          | 0 (0%)      | 1 (1.8%)         | 0 (0%)      |
| Cerebral artery occlusion      | 1 (0.5%)                | 0 (0%)      | 0 (0%)            | 0 (0%)      | 1 (1.8%)         | 0 (0%)      |
| Myocardial infarction          | 0 (0%)                  | 1 (0.5%)    | 0 (0%)            | 1 (0.8%)    | 0 (0%)           | 0 (0%)      |
| Pneumothorax                   | 0 (0%)                  | 1 (0.5%)    | 0 (0%)            | 1 (0.8%)    | 0 (0%)           | 0 (0%)      |
| Seizure                        | 0 (0%)                  | 1 (0.5%)    | 0 (0%)            | 0 (0%)      | 0 (0%)           | 1 (1.8%)    |
| Sepsis                         | 0 (0%)                  | 1 (0.5%)    | 0 (0%)            | 1 (0.8%)    | 0 (0%)           | 0 (0%)      |
| Aspiration pneumonia           | 0 (0%)                  | 1 (0.8%)    | 0 (0%)            | 2 (3.5%)    | 0 (0%)           | 3 (1.6%)    |
| Myocardial infarction          | 0 (0%)                  | 1 (0.8%)    | 0 (0%)            | 0 (0%)      | 0 (0%)           | 1 (0.5%)    |

\* Heidelberg Bleeding Classification of post-procedural hemorrhage.

**Supplemental Table 3.** Multivariate logistic regression, showing the odds ratio for M2 occlusion compared to M1 occlusion for key primary and secondary outcomes.

|                                                    | <b>Adjusted Odds Ratio</b> | <b>95% Confidence Interval</b> | <b>p value</b> |
|----------------------------------------------------|----------------------------|--------------------------------|----------------|
| Good outcome (90 day mRS 0-2), n (%) <sup>1</sup>  | 0.943                      | 0.474 - 1.879                  | 0.8684         |
| 90 day mRS 0-1, n (%) <sup>2</sup>                 | 0.918                      | 0.431 - 1.956                  | 0.8254         |
| All-cause mortality at 90 days, n (%) <sup>2</sup> | 1.428                      | 0.434 - 4.695                  | 0.5576         |

<sup>1</sup> Final model contains the following covariates: clot location (reference MCA M1 occlusion), patient age (reference < 75 years), NIHSS score at admission.

<sup>2</sup> Final model contains the following covariates: clot location (reference MCA M1 occlusion), patient age (reference < 75 years), sex (reference female), NIHSS score at admission.
